# Supplementary material for: Epidemiological characteristics and trends of a Nationwide measles outbreak in Mongolia, 2015–2016
Source: Springer Nature journal article supplement (doi:10.1186/s12889-019-6511-0), 2019-02-15
Supplement: MOESM1 [file 16484770]

Additional file 1

Population data in Mongolia

31th December, 2015

|             | 0 - 11<br>months | 1 – 4<br>years | 5 – 9<br>years | 10 – 14<br>years | 15 – 19<br>years | 20 – 24<br>years | ≥ 25 years | All age   |
|-------------|------------------|----------------|----------------|------------------|------------------|------------------|------------|-----------|
| Aimag       |                  |                |                |                  |                  |                  |            |           |
| Ulaanbaatar | 38,144           | 145,917        | 130,587        | 84,732           | 90,873           | 110,522          | 744,725    | 1,345,500 |
| Arkhangai   | 2,294            | 8,729          | 8,980          | 7,507            | 8,802            | 8,360            | 47,088     | 91,760    |
| Baynkhongor | 2,087            | 8,549          | 8,335          | 6,730            | 8,002            | 7,756            | 42,144     | 83,603    |
| Bayn-Ulgii  | 2,715            | 10,247         | 11,082         | 10,354           | 9,829            | 9,857            | 43,703     | 97,787    |
| Bulgan      | 1,392            | 5,396          | 5,683          | 4,329            | 5,018            | 5,080            | 32,754     | 59,652    |
| Darkhan-Uul | 2,413            | 9,387          | 9,494          | 6,772            | 7,755            | 8,418            | 53,452     | 97,691    |
| Dornod      | 1,896            | 7,637          | 7,638          | 5,529            | 5,764            | 6,659            | 41,265     | 76,388    |
| Dornogovi   | 1,704            | 6,441          | 6,630          | 4,960            | 4,935            | 5,305            | 33,150     | 63,125    |
| Dundgovi    | 1,124            | 3,693          | 4,315          | 3,667            | 3,989            | 3,819            | 23,571     | 44,178    |
| Govi-Altai  | 1,253            | 5,053          | 5,652          | 4,997            | 5,345            | 4,886            | 28,832     | 56,018    |
| Govi-Sumber | 433              | 1,838          | 1,749          | 1,219            | 1,309            | 1,340            | 8,420      | 16,308    |
| Khentii     | 1,756            | 6,852          | 7,169          | 6,077            | 6,157            | 6,252            | 38,076     | 72,339    |
| Khovd       | 2,181            | 8,773          | 8,802          | 7,575            | 8,547            | 7,922            | 39,327     | 83,127    |
| Khuvsgul    | 3,108            | 12,487         | 12,907         | 10,232           | 11,068           | 11,603           | 66,018     | 127,423   |
| Orkhon      | 2,401            | 9,511          | 9,277          | 6,684            | 7,478            | 8,757            | 54,642     | 98,750    |
| Selenge     | 2,441            | 9,660          | 10,325         | 7,964            | 8,542            | 9,048            | 56,745     | 104,725   |
| Sukhbaatar  | 1,567            | 5,829          | 5,598          | 4,434            | 4,954            | 5,251            | 31,159     | 58,792    |
| Tuv         | 2,226            | 8,701          | 8,635          | 6,497            | 7,218            | 7,665            | 48,823     | 89,765    |
| Umnugovi    | 1,670            | 6,281          | 6,013          | 4,693            | 5,120            | 5,282            | 32,308     | 61,367    |
| Uvs         | 2,077            | 8,137          | 8,977          | 7,536            | 8,181            | 7,870            | 37,618     | 80,396    |
| Uvurkhangai | 2,904            | 10,493         | 11,230         | 9,158            | 10,615           | 9,914            | 57,593     | 111,907   |
| Zavkhan     | 1,661            | 6,133          | 7,369          | 5,761            | 6,531            | 6,168            | 36,018     | 69,641    |
| All Aimag   | 79,447           | 305,744        | 296,447        | 217,407          | 236,032          | 257,734          | 1,597,431  | 2,990,242 |

31th December, 2016

|                  | 0 - 11<br>months | 1 – 4<br>years | 5 – 9<br>years | 10 – 14<br>years | 15 – 19<br>years | 20 – 24<br>years | ≥ 25 years       | All age          |
|------------------|------------------|----------------|----------------|------------------|------------------|------------------|------------------|------------------|
| <b>Aimag</b>     |                  |                |                |                  |                  |                  |                  |                  |
| Ulaanbaatar      | 33,211           | 146,295        | 140,362        | 86,704           | 88,152           | 104,399          | 781,669          | 1,380,792        |
| Arkhangai        | 2,002            | 8,948          | 9,533          | 7,328            | 8,874            | 8,372            | 48,452           | 93,509           |
| Baynkhongor      | 1,781            | 8,625          | 8,963          | 6,580            | 7,945            | 7,656            | 43,782           | 85,332           |
| Bayn-Ulgii       | 2,378            | 10,586         | 11,306         | 10,003           | 9,784            | 9,866            | 45,423           | 99,346           |
| Bulgan           | 996              | 5,534          | 6,048          | 4,328            | 5,060            | 5,233            | 33,950           | 61,149           |
| Darkhan-Uul      | 2,088            | 9,681          | 10,130         | 6,835            | 7,622            | 8,100            | 55,340           | 99,796           |
| Dornod           | 1,844            | 7,746          | 8,278          | 5,604            | 5,793            | 6,352            | 42,155           | 77,772           |
| Dornogovi        | 1,385            | 6,735          | 7,123          | 5,180            | 5,155            | 5,302            | 35,726           | 66,606           |
| Dundgovi         | 1,029            | 4,003          | 4,459          | 3,625            | 4,016            | 3,975            | 24,408           | 45,515           |
| Govi-Altai       | 1,025            | 5,075          | 5,837          | 4,886            | 5,472            | 4,810            | 29,589           | 56,694           |
| Govi-Sumber      | 414              | 1,929          | 1,850          | 1,295            | 1,331            | 1,358            | 8,757            | 16,934           |
| Khentii          | 1,683            | 7,057          | 7,587          | 5,913            | 6,242            | 6,200            | 38,926           | 73,608           |
| Khovd            | 1,830            | 8,819          | 9,475          | 7,471            | 8,486            | 8,305            | 40,939           | 85,325           |
| Khuvsgul         | 2,465            | 12,741         | 13,730         | 10,219           | 11,075           | 11,476           | 68,251           | 129,957          |
| Orkhon           | 2,073            | 9,732          | 10,225         | 6,576            | 7,427            | 8,661            | 57,197           | 101,891          |
| Selenge          | 2,034            | 9,778          | 10,995         | 8,039            | 8,468            | 8,541            | 58,822           | 106,677          |
| Sukhbaatar       | 1,257            | 5,929          | 6,157          | 4,443            | 4,940            | 5,059            | 32,247           | 60,032           |
| Tuv              | 1,781            | 8,957          | 9,423          | 6,551            | 7,266            | 7,560            | 51,294           | 92,832           |
| Umnugovi         | 1,428            | 6,612          | 6,674          | 4,598            | 5,215            | 5,238            | 33,896           | 63,661           |
| Uvs              | 2,027            | 8,150          | 9,302          | 7,305            | 8,059            | 7,889            | 38,645           | 81,377           |
| Uvurkhangai      | 2,412            | 10,899         | 11,712         | 9,019            | 10,530           | 10,002           | 59,337           | 113,911          |
| Zavkhan          | 1,436            | 6,370          | 7,463          | 5,686            | 6,641            | 6,224            | 37,032           | 70,852           |
| <b>All Aimag</b> | <b>68,579</b>    | <b>310,201</b> | <b>316,632</b> | <b>218,188</b>   | <b>233,553</b>   | <b>250,578</b>   | <b>1,665,837</b> | <b>3,063,568</b> |
